# Supplementary material
Source: PubMed Central journal article supplement (PMC5392576)
Supplement: 10.1074_M116.758888_jbc.M116.758888-2.pdf [file 10.1074_M116.758888_jbc.M116.758888-2.pdf]

NTC Unique (79 genes)

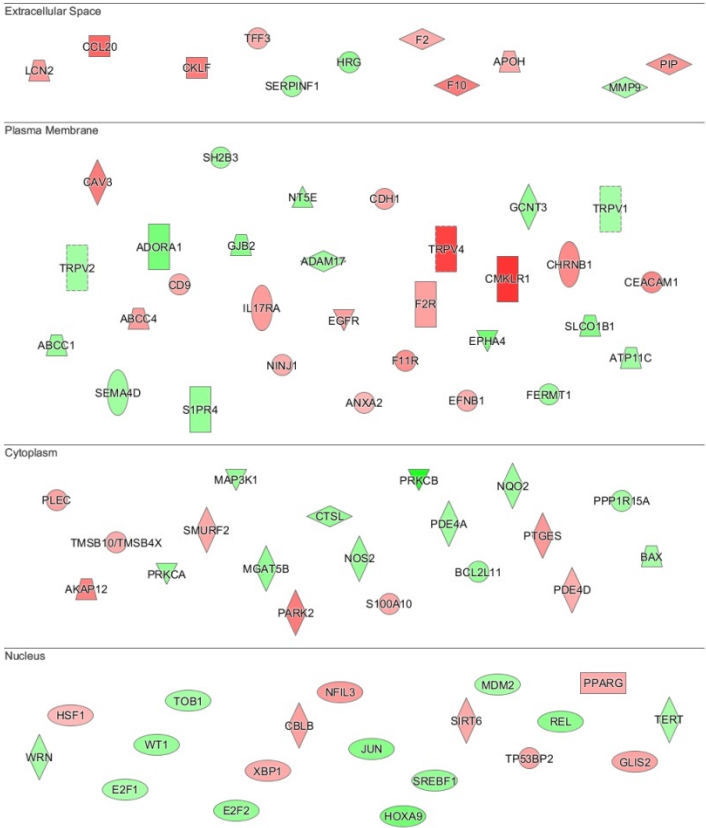

MDFIC-KD Unique (191 genes)

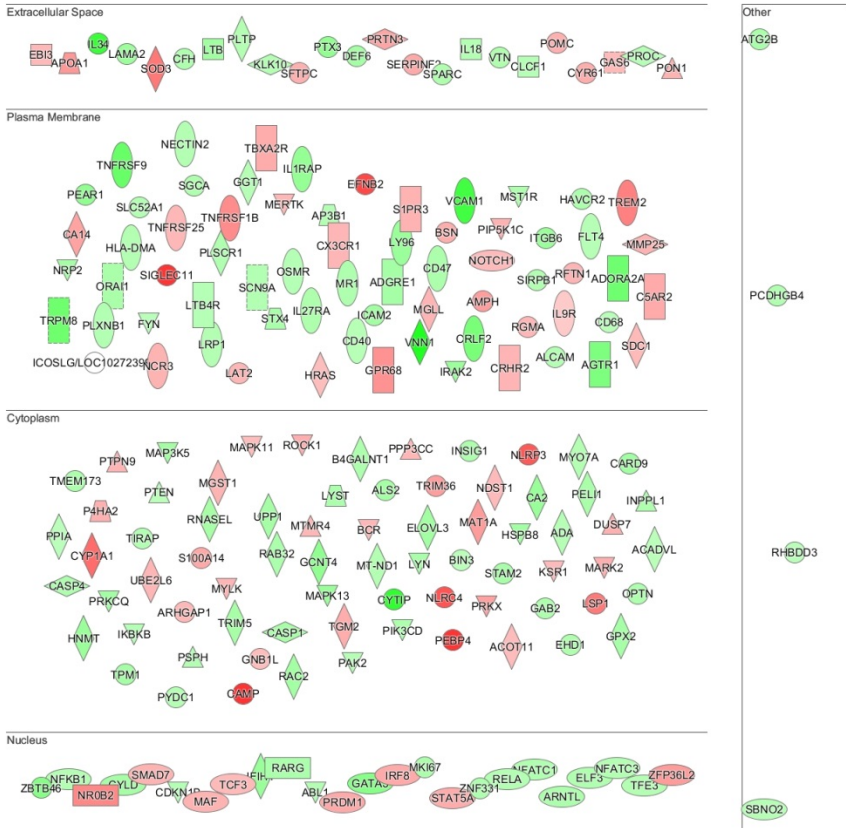

© 2000-2015 GIAGEN. All rights reserved.

© 2000-2015 GIAGEN. All rights reserved.

**Figure S2. Inflammatory response genes differentially regulated by glucocorticoids depending on the presence or absence of MDFIC.** Left panel shows genes associated with Inflammatory Response that are uniquely regulated by glucocorticoids only in NTC cells. Right panel shows genes associated with Inflammatory Response that are uniquely regulated by glucocorticoids only in MDFIC-KD cells. Red and green colors correspond to increased and decreased expression, respectively.
